# Supplementary material for: US COVID‐19 Shutdown Demonstrates Importance of Background NO2 in Inferring NOx Emissions From Satellite NO2 Observations
Source: PubMed Central journal article supplement — Geophys Res Lett. 2021 May 18;48(10):e2021GL092783. doi: 10.1029/2021GL092783 (PMC8206743; doi:10.1029/2021gl092783), 2021-05-18
Supplement: GRL-48-e2021GL092783-s001.pdf [file GRL-48-e2021GL092783-s001.pdf]

**US COVID-19 shutdown demonstrates importance of background NO<sub>2</sub>  
in inferring NO<sub>x</sub> emissions from satellite NO<sub>2</sub> observations**

**Zhen Qu<sup>1</sup>, Daniel J. Jacob<sup>1</sup>, Rachel F. Silvern<sup>2,3</sup>, Viral Shah<sup>1</sup>, Patrick C.  
Campbell<sup>4,5</sup>, Lukas C. Valin<sup>6</sup>, Lee T. Murray<sup>7</sup>**

<sup>1</sup> School of Engineering and Applied Science, Harvard University, Cambridge, MA, 02138, USA

<sup>2</sup> Department of Earth and Planetary Sciences, Harvard University, Cambridge, MA, 02138, USA

<sup>3</sup> Now at The National Academies of Sciences, Engineering, and Medicine, Washington, DC, 20001, USA

<sup>4</sup> Center for Spatial Information Science and Systems/Cooperative Institute for Satellite Earth System Studies, George Mason University, Fairfax, VA, 22030, USA.

<sup>5</sup> Office of Air and Radiation, Air Resources Laboratory, National Oceanic and Atmospheric Administration, College Park, MD, 20740, USA.

<sup>6</sup> Office of Research and Development, United States Environmental Protection Agency, Triangle Research Park, NC, 27711, USA

<sup>7</sup> Department of Earth and Environmental Sciences, University of Rochester, Rochester, NY, 14627, USA

**Contents of this file**

Figures S1 to S5

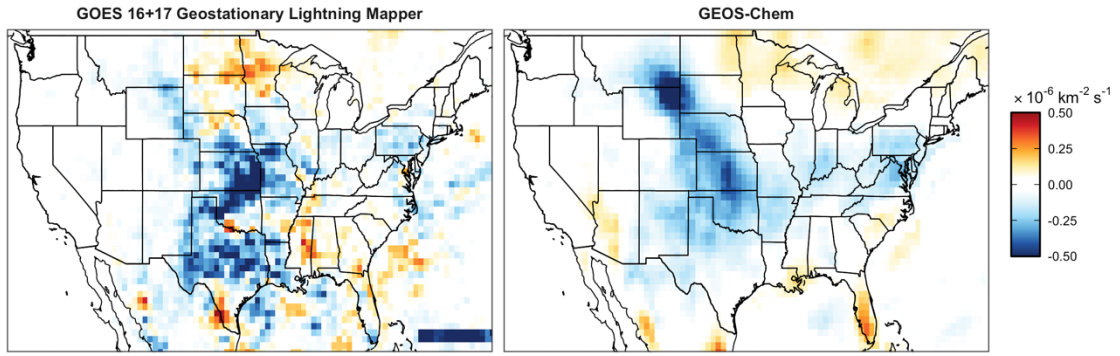

**Figure S1.** Differences in lightning density averaged over March-August in 2020 relative to 2019.

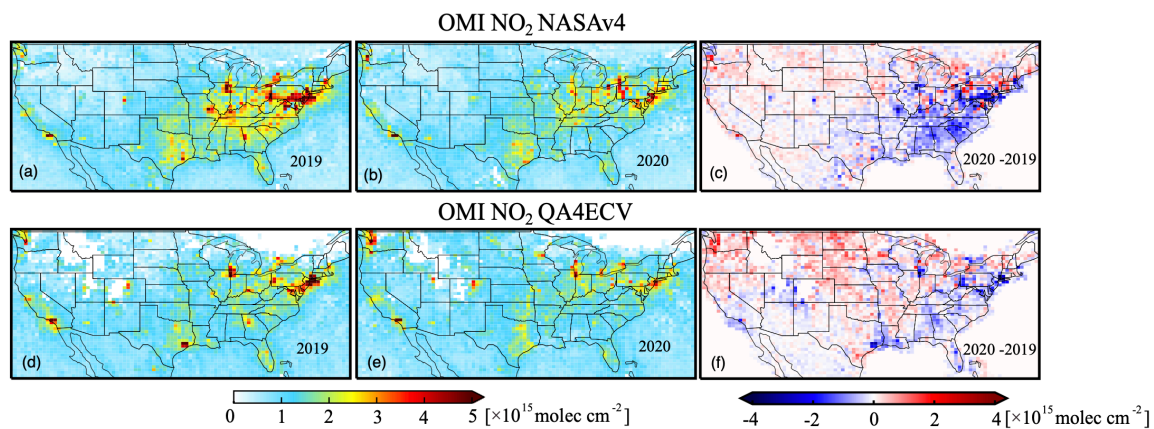

**Figure S2.** OMI NO<sub>2</sub> column densities averaged over March and April in 2019 (a, d), 2020 (b, e), and the differences between 2020 and 2019 (c, f). We use two different OMI retrievals the version 4 NASA NO<sub>2</sub> product and the QA4ECV product.

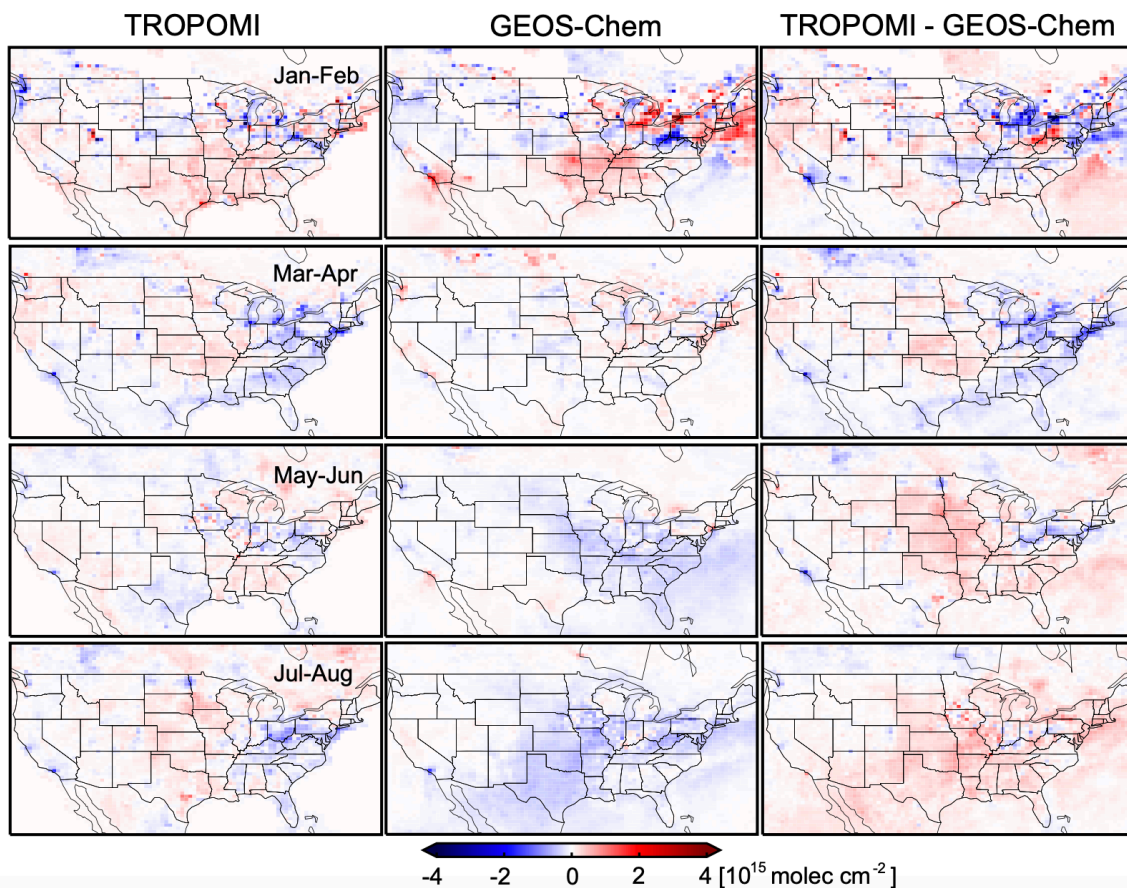

**Figure S3.** Absolute changes in NO<sub>2</sub> column densities from 2019 to 2020 from TROPOMI (left column), GEOS-Chem simulations with TROPOMI averaging kernel applied (middle column), and the difference between the first two columns (right columns). After removing this meteorology impact from the differences in TROPOMI NO<sub>2</sub> columns between 2019 and 2020 (right column), NO<sub>2</sub> reductions in Seattle, San Francisco, and Los Angeles in March and April are more consistent with our understanding of the shutdown in these cities.

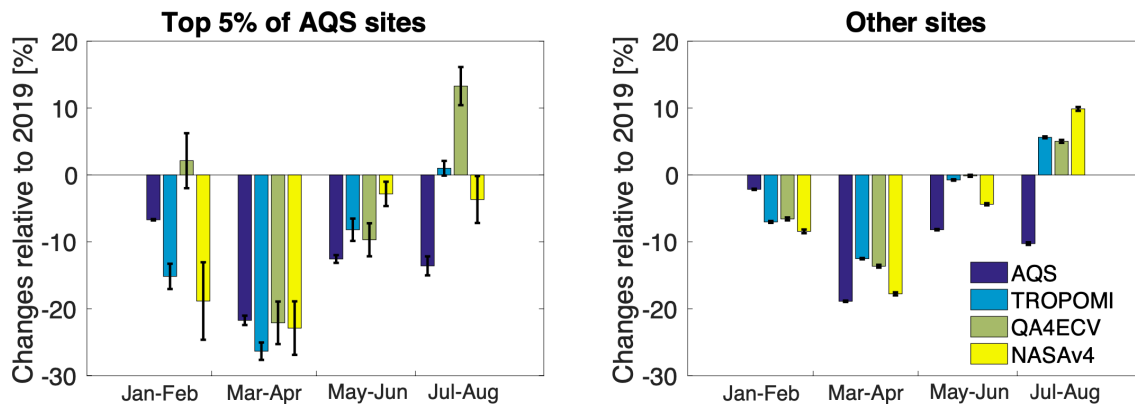

**Figure S4.** Relative changes of NO<sub>2</sub> concentrations in 2020 compared to 2019. Only grid cells that have collocated observations from AQS, TROPOMI, and two OMI retrievals (NASAv4 and AQ4ECV) are used in the calculation.

## Annual surface NO<sub>2</sub>, 2019

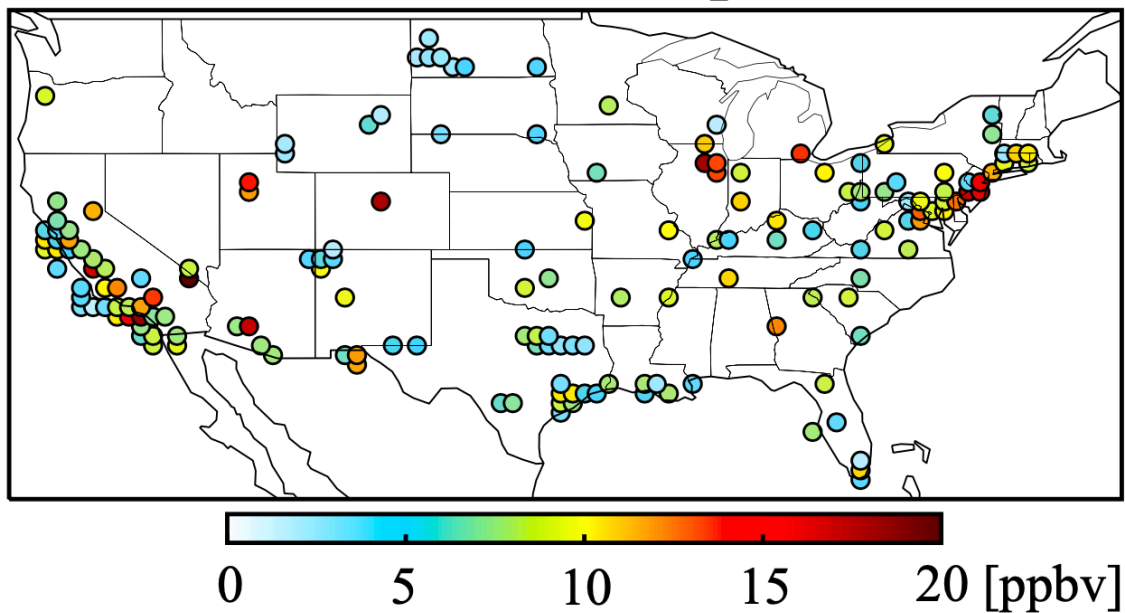

**Figure S5.** Annual mean surface NO<sub>2</sub> at grid cells with continuous AQS records for 2005-2019.
